# Supplementary material
Source: publisher figshare collection journal article supplement (https://acs.figshare.com/ndownloader/files/6507891)
Supplement: Supplementary file 1 [file 6507891]

# Tunable Substrate Wettability by Thin Water Layer

Felipe Jiménez-Ángeles<sup>†</sup> and Abbas Firoozabadi<sup>\*,†,‡</sup>

*Reservoir Engineering Research Institute, Palo Alto, CA 94301, USA, and Department of Chemical and Environmental Engineering, Yale University, New Haven, CT 06510, USA*

E-mail: abbas.firoozabadi@yale.edu

Phone: +1 (650)326-9172. Fax: +1 (650) 472-9285

## Supporting Information

### Contact angle setup construction

The droplet is built (see Figure S1a) by placing 2340 *n*-decane molecules in a prismatic box of approximately  $18\text{ nm} \times 6.5\text{ nm} \times 7.0\text{ nm}$  forming five layers, each layer is made of 468 molecules. 120 surfactant molecules are placed inside the hydrocarbon droplet between the layers of *n*-decane molecules. Aqueous solutions are prepared separately in three prismatic boxes, two of  $18.6\text{ nm} \times 6.1\text{ nm} \times 7\text{ nm}$  and a third one of  $18.5\text{ nm} \times 18.7\text{ nm} \times 5\text{ nm}$ , respectively. A 2-ns MD simulation is performed at  $P = 200\text{ bar}$  and  $T = 298\text{ K}$  in 3D periodic boundary conditions. The system evolves to a cylindrical droplet (see Figure S1a).

To take into account the hydration of the substrate, pre-equilibration of the surface is carried out by placing the substrate next to an aqueous solution at salt concentration  $\rho_s$  and equilibrated by means of a 3-ns molecular dynamics simulation (see Figure S1b). The ions

---

\*To whom correspondence should be addressed

<sup>†</sup>Reservoir Engineering Research Institute

<sup>‡</sup>Yale University

and water molecules above a distance  $z_h$  from the substrate are removed and molecules within  $z < z_h$  are kept as part of the hydrated substrate;  $z$  is measured from the outermost layer of oxygen atoms from the substrate. The value of  $z_h$  is established based on the perpendicular density profiles and it varies from  $z_h = 0.8$  nm at 0 wt% NaCl to  $z_h = 1.0$  nm at 6.3 wt% NaCl. Details of the pre-equilibration simulations are given elsewhere.<sup>1</sup> The composition of the simulated setups is given in Table I.

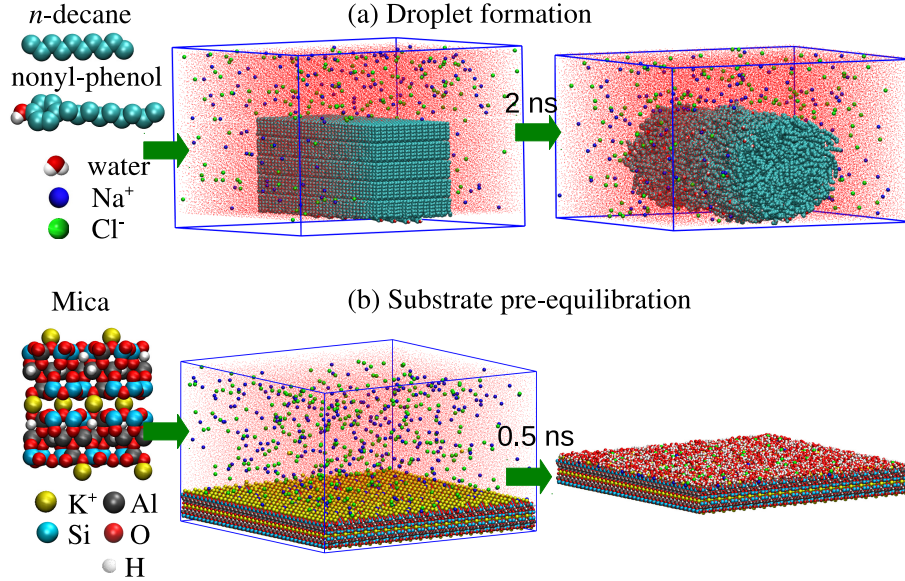

Figure S1: Graphical representation of the setup creation steps; (a) droplet formation, and (b) substrate pre-equilibration. The color code is the same as in Figure 1.

### Contact angle calculation method

We use the density profiles of *n*-decane  $\rho_d(y, z)$  to define the droplet shape. The density contour profiles in the interfacial region ( $\rho_d(y, z) = 0.5\rho_b$ ) are circular and concentric. The profiles are fitted by a circle given by  $(y - y_0)^2 + (z - z_0)^2 = R^2$ ;  $y_0$  and  $z_0$  are the circle center coordinates and  $R$  is the circle radius. Figure S2 shows the bottom part of the droplet density contour profile at 0, 1.1, and 3.3 NaCl wt% from molecular dynamics simulations and the fitted circle. The contact angle  $\theta$  is formed by: 1) the vertical line passing through the circle's center, and 2) the line connecting the circle's center and the intersection point of the droplet profile and the horizontal contact plane at  $(y_c, z_c)$  (see Figure S2). The contact

plane is defined where the droplet profile deviates from circular shape; it is different at each salt concentration because the thickness of the water layer may depend on the salt concentration. The contact angle is obtained by  $\tan \theta = (y_c - y_0)/(z_c - z_0)$ . The accuracy of the contour plot is  $\pm 0.045$  nm and  $\pm 0.04$  nm in  $y$  and  $z$  directions, respectively, which gives a contact angle error of about  $\pm 0.3^\circ$ . The thickness of the fluid-fluid interface defined between  $\rho_d(y, z) = 0.8\rho_b$  and  $0.2\rho_b$  is about 0.45 nm thick. This thickness is for the region outside the confinement.

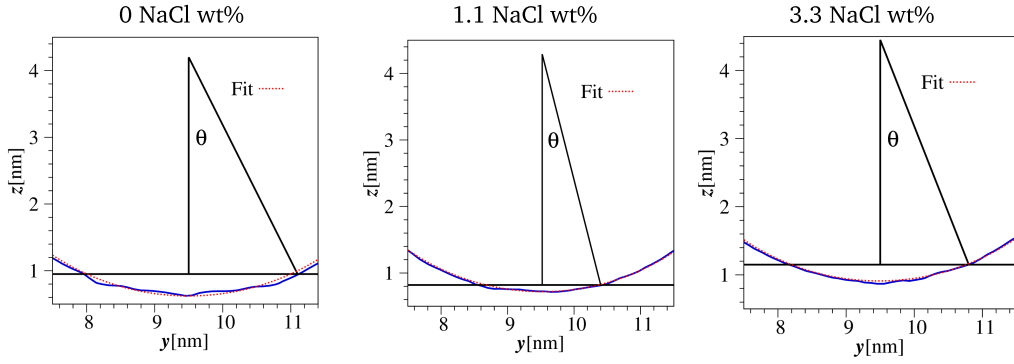

Figure S2: Closeup view of the bottom part of the droplet profile  $\rho_d(y, z) = 0.5\rho_b$  at  $\rho_s = 0$ , 1.1, and 3.3 wt% NaCl. The contact angle  $\theta$  is obtained from a fitted circle (red-dotted line) and its intersection at horizontal contact plane.

### Fluid-fluid interface with KCl and KI

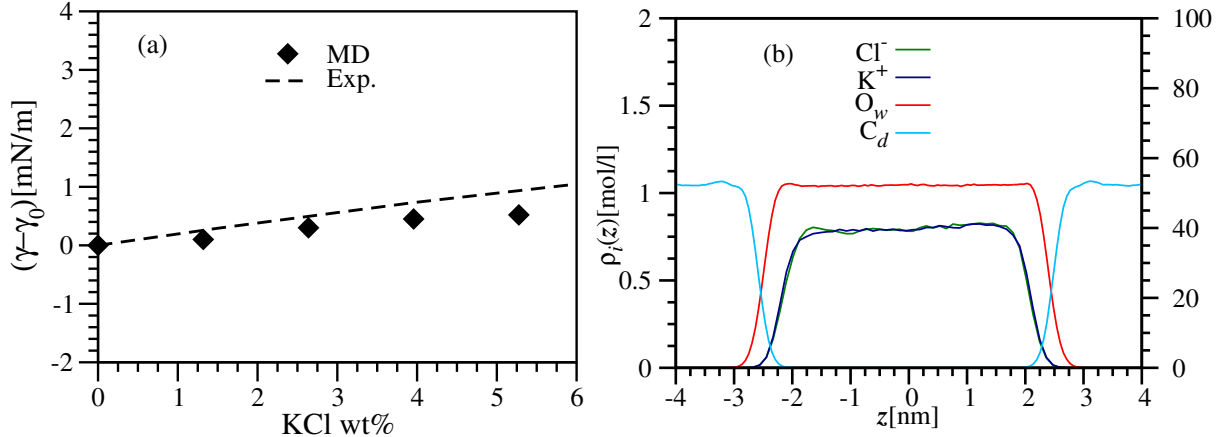

Figure S3: *n*-decane-KCl solution interface. (a) Interfacial tension difference  $(\gamma - \gamma_0)$  as a function of the KCl concentration in wt% ( $P_z = 1$  bar and  $T = 293$  K). Black diamonds are the results from MD simulations and the dashed line represents the measured interfacial tension.<sup>2</sup> The interfacial tension at zero salt concentration from MD simulations in *n*-decane is  $\gamma_0 = 49.05$  mN/m; the experimental value in *n*-dodecane is  $\gamma_0 = 52.81$  mN/m. The difference between the experimental interfacial tension of *n*-dodecane and *n*-decane is about 0.1 mN/m.<sup>2</sup> (b) Density profiles of  $\text{K}^+$  and  $\text{Cl}^-$  ions, water-oxygen atom ( $\text{O}_w$ ), and *n*-decane carbon atoms ( $\text{C}_d$ ) in the *n*-decane-electrolyte solution interface at  $\rho_s = 5.3$  KCl wt%. The left scale is for the ions and the right scale is for water-oxygen atoms and *n*-decane.

Figure S3a portrays the linear difference of the interfacial tension  $(\gamma - \gamma_0)$  in *n*-decane-electrolyte solution as a function of the KCl concentration; the results from MD simulations are in agreement with the experimental measurements. The density profiles of the species in the *n*-decane-electrolyte solution interface are presented in Figure S3b at  $\rho_s = 5.3$  KCl wt%. The  $\text{K}^+$  and  $\text{Cl}^-$  density profiles show that the ions are outside the interface.

The interfacial tension difference  $(\gamma - \gamma_0)$  of the *n*-decane-electrolyte solution as a function of the KI concentration is shown in Figure S4a. The results from MD simulations and the experimental measurements show that the interfacial tension is slightly less than  $\gamma_0$  and stay nearly constant as a function of the KI concentration. The density profiles of the species in the *n*-decane-electrolyte solution interface are presented in Figure S4b at  $\rho_s = 8.8$  KCl wt%. The density profiles show that ions are not equally distributed at the interface;  $\text{I}^-$  ions penetrate deeper into the interface than  $\text{K}^+$  ions. The uneven ionic distribution at the interface produces a small decrease of the interfacial tension. Our results are different

from the prediction of a modified Poisson-Boltzmann theory where the ions  $I^-$  are strongly adsorbed at the oil-water interface.<sup>3</sup>

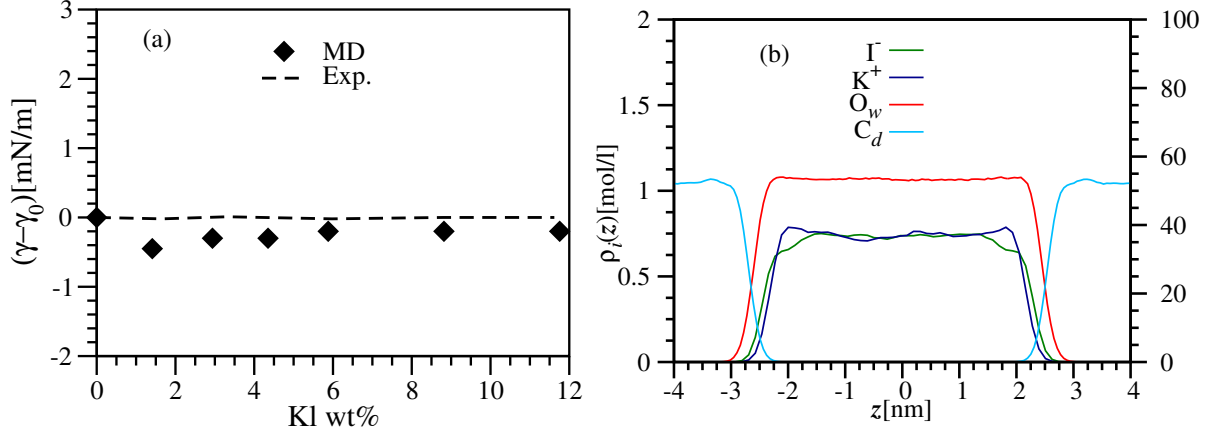

Figure S4: *n*-decane-KI solution interface. (a) Interfacial tension difference  $(\gamma - \gamma_0)$  as a function of KI concentration in wt% ( $P_z = 1$  bar and  $T = 293$  K). Black diamonds are the results from MD simulations and the dashed line represents the measured interfacial tension in *n*-dodecane.<sup>2</sup> The difference between the experimental interfacial tension of *n*-dodecane and *n*-decane is about 0.1 mN/m.<sup>2</sup> The interfacial tension at zero salt concentration from MD simulations in *n*-decane is  $\gamma_0 = 49.05$  mN/m; the experimental value in *n*-dodecane is  $\gamma_0 = 52.81$  mN/m. (b) Density profiles of  $K^+$  and  $I^-$  ions, water-oxygen atom ( $O_w$ ), and *n*-decane carbon atoms ( $C_d$ ) in the *n*-decane-electrolyte solution interface at  $\rho_s = 8.8$  KI wt%. The left scale is for the ions and the right scale is for water-oxygen atoms and *n*-decane.

### Thin liquid layer at 0.1, 1.1 and 6.2 NaCl wt%:

The reduced density profiles and snapshots of the liquid layer under the droplet at 0.15, 1.9, and 6.3 NaCl wt% are shown in Figures S5, S6, and S7, respectively. At the three salt concentrations the density profile of water oxygen shows a sharp peak at  $z \approx 0.26$  nm and a hump at  $z \approx 0.20$  nm. Depending on the salt concentration other peaks are observed at higher  $z$ . The water density profile drops monotonically to zero towards the oil droplet. The water layer thickness is 0.5, 0.76, and 1.1 nm at 0.15, 1.9, and 6.3 NaCl wt%, respectively. The reduced density profile of  $n$ -decane increases from zero in the water layer to a bulk value in the oil droplet. The reduced density profile of  $n$ -decane changes as the salt concentration increases because of the increase of the water layer thickness.

The surfactant head density profiles in the thin liquid layer are centered at  $z = 0.8, 1,$  and  $1.5$  nm at 0.15, 1.9, and 6.3 NaCl wt%, respectively (Figures S5, S6, and S7). The center of the distribution reflects the water layer thickness. The interface at the bottom of the droplet is narrower (in the  $y$ -direction) at 1.9 NaCl wt% than at 0.15 and 6.3 NaCl wt%. As discussed in the text, the width of the rugged interface is related to the contact angle.

The  $\text{Na}^+$  ions adsorbed on the substrate give rise to a sharp peak at  $z \approx 0.2$  nm in the reduced density profiles shown in Figures S5, S6, and S7. At 1.9 NaCl wt%,  $\text{Na}^+$  ions are nearly depleted from the middle region under the droplet and are found only at the lateral entries of the water layer. At 6.3 NaCl wt%,  $\text{Na}^+$  ions are found in the confined liquid layer which is seen in the reduced density profile as a secondary peak at  $z \approx 0.48$  nm. The  $\text{Cl}^-$  reduced density profiles at 1.9 and 6.3 NaCl wt% (Figures S6 and S7, respectively) exhibit a peak at  $z \approx 0.4$  nm and decrease to zero towards the oil droplet.  $\text{Cl}^-$  ions compensate the charge of the adsorbed  $\text{Na}^+$  ions. At 6.3 NaCl wt%,  $\text{Cl}^-$  ions are observed at the middle region of the liquid layer whereas at 1.9 NaCl wt%  $\text{Cl}^-$  ions are only found at the lateral entries of the liquid layer. At 0.15 NaCl wt%,  $\text{Cl}^-$  ions are not found close to the confined liquid layer region; the  $\text{Cl}^-$  density profile is zero.

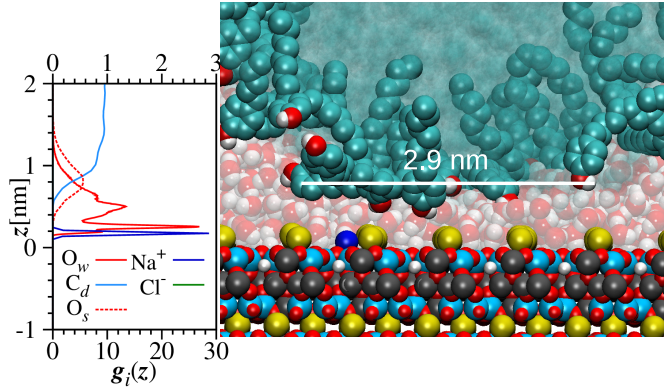

Figure S5: Left: Reduced density profiles of ions ( $Na^+$  and  $Cl^-$ ), water ( $O_w$ ),  $n$ -decane ( $C_d$ ), and the surfactant head oxygen ( $O_s$ ) in the region between the droplet and the substrate at 0.15 wt% NaCl. Horizontal top scale is for  $O_w$ ,  $C_d$ , and  $O_s$  whereas the bottom scale is for  $Na^+$  and  $Cl^-$ . Right: Snapshot showing the ions, water, and  $n$ -decane molecules at the bottom part of the droplet. The region occupied by  $n$ -decane molecules is colored transparent-cyan whereas water molecules are semitransparent and in the background; the color code is the same as in Figure 1.

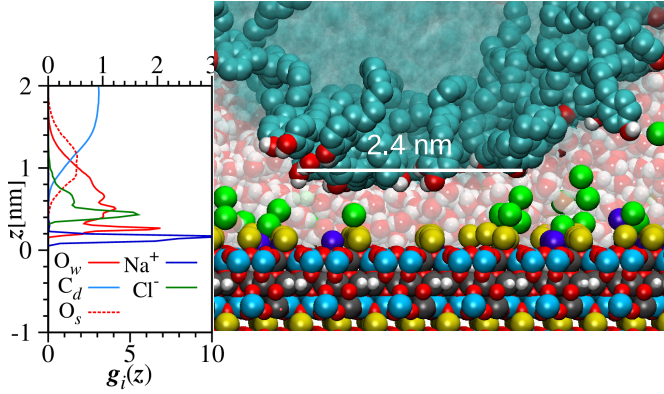

Figure S6: Left: Reduced density profiles of ions ( $Na^+$  and  $Cl^-$ ), water ( $O_w$ ),  $n$ -decane ( $C_d$ ), and the surfactant head oxygen ( $O_s$ ) in the region between the droplet and the substrate at 1.9 wt% NaCl. Horizontal top scale is for  $O_w$ ,  $C_d$ , and  $O_s$  whereas the bottom scale is for  $Na^+$  and  $Cl^-$ . Right: Snapshot showing the ions, water, and  $n$ -decane molecules at the bottom part of the droplet. The region occupied by  $n$ -decane molecules is colored transparent-cyan whereas water molecules are semitransparent and in the background; the color code is the same as in Figure 1.

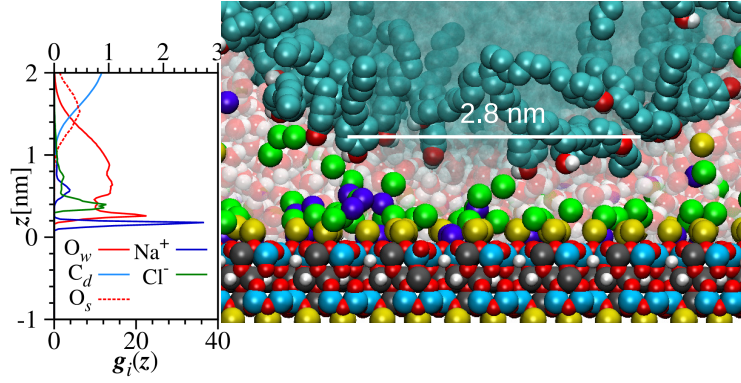

Figure S7: Left: Reduced density profiles of ions ( $Na^+$  and  $Cl^-$ ), water ( $O_w$ ),  $n$ -decane ( $C_d$ ), and the surfactant head ( $O_s$ ) in the region between the droplet and the substrate at 6.3 wt% NaCl. Horizontal top scale is for  $O_w$ ,  $C_d$ , and  $O_s$  whereas the bottom scale is for  $Na^+$  and  $Cl^-$ . Right: Snapshot showing the ions, water, and  $n$ -decane molecules at the bottom part of the droplet. The region occupied by  $n$ -decane molecules is colored transparent-cyan whereas water molecules are semitransparent and in the background; the color code is the same as in Figure 1.

### Ionic adsorption as a function of salt concentration

The reduced density profiles of  $\text{Na}^+$  and  $\text{Cl}^-$  ions in the region under the complex oil droplet are presented in Figures S8a and S8b, respectively, as a function of the perpendicular distance to the substrate and at different salt concentrations. The reduced density profiles of  $\text{Na}^+$  and  $\text{Cl}^-$  ions in the region under the model oil droplet (*n*-decane) are presented in Figures S9a and S9b, respectively.  $\text{Na}^+$  and  $\text{Cl}^-$  adsorption at the region under complex oil droplet exhibits a non-monotonic behavior. The minimum of  $\text{Na}^+$  adsorption under the complex oil droplet is observed at 1.1 wt% NaCl and is more pronounced in the complex oil droplet. At 0.15 wt% NaCl,  $\text{Cl}^-$  ion density profile is zero under the complex oil droplet.

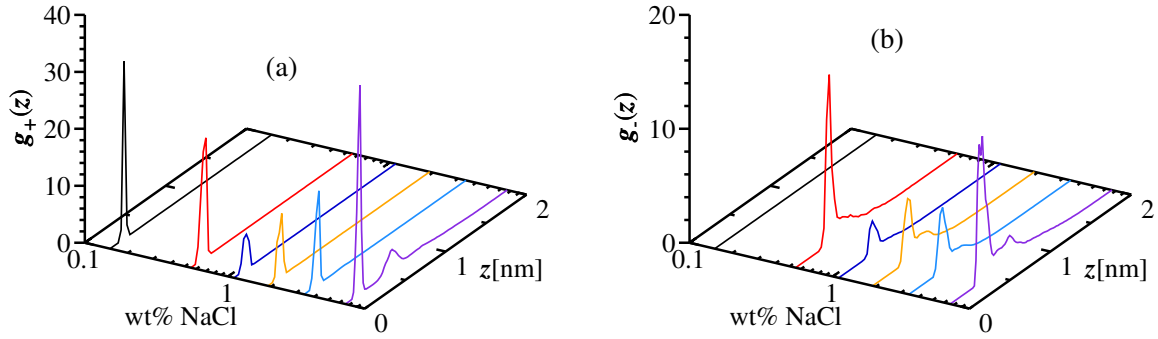

Figure S8: The reduced density profiles of (a)  $\text{Na}^+$  and (b)  $\text{Cl}^-$  ions in the region between the complex oil droplet and the substrate at 0.15 (black), 0.55 (red), 1.1 (blue), 1.9 (yellow), 3.3 (light blue), and 6.3 (purple) wt% NaCl.

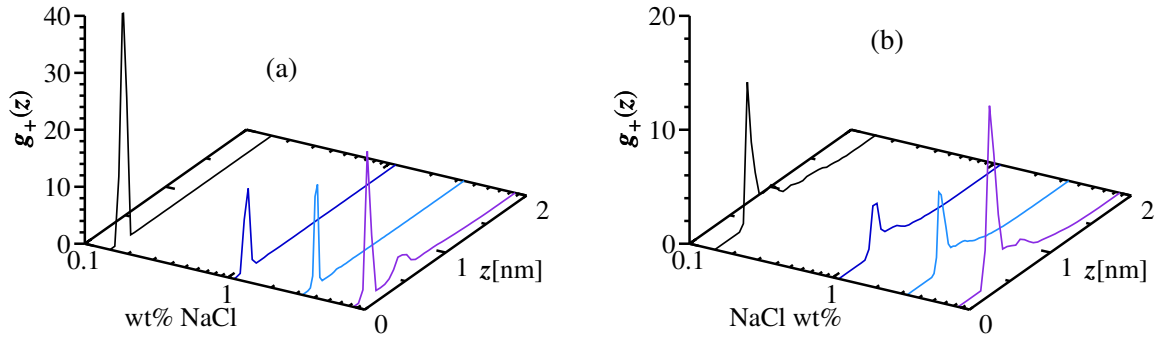

Figure S9: The reduced density profiles of (a)  $\text{Na}^+$  and (b)  $\text{Cl}^-$  ions in the region between the model oil droplet and the substrate at 0.15 (black line), 1.1 (blue), 3.3 (light blue), and 7.7 (purple) wt% NaCl.

## Simulation Parameters

Table S1: Lennard-Jones parameters and charge of ions in the solution<sup>4</sup>

| Atom          | $q[e]$ | $\sigma[\text{nm}]$ | $\epsilon[\text{kJ/mol}]$ |
|---------------|--------|---------------------|---------------------------|
| $\text{Na}^+$ | 1      | 0.333               | $1.16 \times 10^{-2}$     |
| $\text{K}^-$  | 1      | 0.365               | $8.36 \times 10^{-1}$     |
| $\text{Cl}^-$ | -1     | 0.441               | $4.93 \times 10^{-1}$     |
| $\text{I}^+$  | -1     | 0.54                | $1.92 \times 10^{-2}$     |

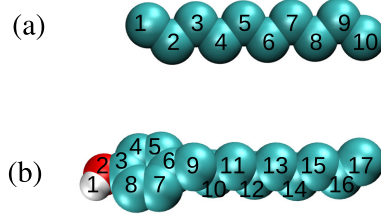

Figure S10: (a) *n*-decane and (b) nonylphenol molecules; the atom indices used to assign the force field parameters in Tables S1 to S3 are shown.

Table S2: Lennard-Jones parameters of beads forming *n*-decane. Indices are assigned according to Figure S10a.

| Index    | Atom          | $q[e]$ | $\sigma[\text{nm}]$ | $\epsilon[\text{kJ/mol}]$ |
|----------|---------------|--------|---------------------|---------------------------|
| 1 and 10 | $\text{CH}_3$ | 0      | 0.390               | $7.32 \times 10^{-1}$     |
| 2 to 9   | $\text{CH}_2$ | 0      | 0.390               | $4.93 \times 10^{-1}$     |

The torsion potential energy in the *n*-decane molecule is modeled by means of the Fourier function  $V_F(\phi) = 1/2[C_1(1 + \cos(\phi)) - C_2(1 + \cos(2\phi)) + C_3(1 + \cos(3\phi)) - C_4(1 + \cos(4\phi))]$ ;  $\phi$  is the dihedral angle. The coefficients are given in Table S4.<sup>5</sup>

Table S3: The equilibrium bond distance ( $b_0$ ) between pairs of first neighbors and the equilibrium bending angle ( $\theta_0$ ) in triplets of neighboring atoms in the  $n$ -decane molecule.<sup>5</sup>

| Molecule    | $b_0$ [nm] | $\theta_0$ [°] |
|-------------|------------|----------------|
| $n$ -decane | 0.153      | 114            |

Table S4:  $C_n$  torsion parameters in quadruplets of neighboring atoms of  $n$ -decane

| Molecule    | $C_1$ [kJ/mol] | $C_2$ [kJ/mol] | $C_3$ [kJ/mol] | $C_4$ [kJ/mol] |
|-------------|----------------|----------------|----------------|----------------|
| $n$ -decane | 5.90           | -1.13          | 13.15          | 0              |

Table S5: Lennard-Jones parameters of beads forming the surfactant molecule (nonylphenol).<sup>5,6</sup> Indices are assigned according to Figure S10b.

| index   | Atom            | $q[e]$ | $\sigma$ [nm] | $\epsilon$ [kJ/mol]   |
|---------|-----------------|--------|---------------|-----------------------|
| 1       | H               | 0.435  | 0.00          | 0.00                  |
| 2       | O               | -0.585 | 0.307         | 0.711                 |
| 3       | CH              | 0.150  | 0.375         | 0.460                 |
| 4 to 8  | CH              | 0.00   | 0.375         | 0.460                 |
| 9 to 16 | CH <sub>2</sub> | 0.00   | 0.390         | $4.93 \times 10^{-1}$ |
| 17      | CH <sub>3</sub> | 0.00   | 0.370         | $7.32 \times 10^{-1}$ |

Table S6: Bond distance  $b_0$  between pairs of first neighbors. Indices are assigned according to Figure S10b.

| Molecule    | Indices      | $b_0$ [nm] |
|-------------|--------------|------------|
| Nonylphenol | 1,2          | 0.095      |
| Nonylphenol | 2 to 8       | 0.139      |
| Nonylphenol | 3,9; 9 to 17 | 0.153      |

Table S7: Bending equilibrium  $\theta_0$  angle in triplets of neighboring atoms in the surfactant molecule. Indices are assigned according to Figure S10b.

| Molecule    | Indices         | $\theta_0$ [°] |
|-------------|-----------------|----------------|
| Nonylphenol | 1,2,3           | 114            |
| Nonylphenol | 2,3,4; 2,3,8    | 120            |
| Nonylphenol | 3 to 8          | 120            |
| Nonylphenol | 6,9,10; 9 to 17 | 114            |

Dihedral angles of the atoms in the aromatic ring of the head are described by the Ryckaert-Bellemans function<sup>7</sup>  $V_{RB}(\phi) = \sum (-1)^n F_n (\cos(\phi))^n$ ; the  $F_n$  coefficients are given in Table S8.

Table S8:  $F_n$  torsion parameters in quadruplets in the surfactant head (atoms 3 to 8, see Figure S10b).

| Molecule    | $F_1$ [kJ/mol] | $F_2$ [kJ/mol] | $F_3$ [kJ/mol] | $F_4$ [kJ/mol] | $F_5$ [kJ/mol] |
|-------------|----------------|----------------|----------------|----------------|----------------|
| Nonylphenol | 30.33          | 0.00           | -30.33         | 0.00           | 0.00           |

Dihedral angles in the OH group-aromatic ring and in the head-tail junctions are described by  $V_d(\phi) = k_\phi[1 + \cos(2\phi - \phi_0)]$ ; the atoms indices and the constants are given in Table S9.

Table S9: Dihedral angle parameters in quadruplets in the OH group-aromatic ring and in the head-tail junctions.

| Indices  | $k_\phi$ (kJ/mol/) | $\phi_0$ [°] |
|----------|--------------------|--------------|
| 1,2,3,4  | 4.6                | 180          |
| 2,3,4,5  | 4.6                | 180          |
| 5,6,9,10 | 1.1                | 0.0          |

Additional torsion angles in the tail of nonylphenol (atoms 9 to 17) are described by the same function and parameters as in *n*-decane (Table S4).

## References

- (1) Jiménez-Ángeles, F.; Firoozabadi, A. Contact Angle, Liquid Film, Liquid-Liquid and Liquid-Solid Interfaces in Model Oil-Brine-Substrate Systems. *J. Phys. Chem. C* **2016**, *120*, 11910–19917.
- (2) Aveyard, R.; Saleem, S. M. Interfacial Tensions at Alkane-Aqueous Electrolyte Interfaces. *J. Chem. Soc., Faraday Trans. 1* **1976**, *72*, 1609–1617.
- (3) dos Santos, A. P.; Levin, Y. Ions at the Wateroil Interface: Interfacial Tension of Electrolyte Solutions. *Langmuir* **2012**, *28*, 1304–1308.

- (4) Jorgensen, W. L. In *The Encyclopedia of Computational Chemistry*; Schleyer, e. a., P. v. R., Ed.; John Wiley & Sons: Dordrecht, 1998; Vol. 3; Chapter OPLS Force Fields.
- (5) Martin, M. G.; Siepmann, J. I. Transferable Potentials for Phase Equilibria. 1. United-Atom Description of n-Alkanes. *J. Phys. Chem. B* **1998**, *102*, 2569–2577.
- (6) Jorgensen, W. L.; Tirado-Rives, J. The OPLS [Optimized Potentials for Liquid Simulations] Potential Functions for Proteins, Energy Minimizations for Crystals of Cyclic Peptides and Crambin. *J. Am. Chem. Soc.* **1988**, *110*, 1657–1666.
- (7) Ryckaert, J.-P.; Bellemans, A. Molecular Dynamics of Liquid n-butane Near its Boiling Point. *Chem. Phys. Lett.* **1975**, *30*, 123–125.
